# Supplementary material
Source: MDPI journal article supplement (https://www.mdpi.com/1996-1073/17/9/1985)
Supplement: s1 [file s1]

40. Jakimowicz, A. (2022). The Energy Transition as a Super Wicked Problem: The Energy Sector in the Era of Prosumer Capitalism. *Energies*, 15(23), 9109. <https://doi.org/10.3390/en15239109>
41. Buga, C. S., & Viana, J. C. (2022). The role of printed electronics and related technologies in the development of smart connected products. *Flexible and Printed Electronics*, 7(4), 043001. <https://doi.org/10.1088/2058-8585/ac91de>
42. Biegańska, M. (2022). IoT-Based Decentralized Energy Systems. *Energies*, 15(21), 7830. <https://doi.org/10.3390/en15217830>
43. Zhou, Y. (2022). Advances in energy flexible buildings—perspectives and challenges. *Energy and AI*, 100187. <https://doi.org/10.1016/j.egyai.2022.100187>
44. Goh, C. S. & Potter, L. (2022). Bio-economy for sustainable growth in developing countries: The case of oil palm in Malaysia and Indonesia. *Biofuels, Bioproducts and Biorefining*, 16. 10.1002/bbb.2381
45. Nadeem, A. (2022). A survey on peer-to-peer energy trading for local communities: Challenges, applications, and enabling technologies. *Frontiers in Computer Science*, 4. <https://doi.org/10.3389/fcomp.2022.1008504>
46. Ullah, Z., Wang, S., Wu, G., Hasanien, H. M., M. Waqas Jabbar, Qazi, H., Tostado-Véliz, M., Turkey, R. A., & M.R. Elkadeem. (2022). *Advanced studies for probabilistic optimal power flow in active distribution networks: A scientometric review*. 16(18), 3579–3604. <https://doi.org/10.1049/gtd2.12555>
47. Rejeb, A., Rejeb, K., Abdollahi, A., Al-Turjman, F., & Treiblmaier, H. (2022). The Interplay between the Internet of Things and agriculture: A bibliometric analysis and research agenda. *Internet of Things*, 19, 100580. <https://doi.org/10.1016/j.iot.2022.100580>
48. Rafiq, M. S., Basit, B. A., Mohammed, S. A. Q., & Jung, J. (2022). A comprehensive state-of-the-art review of power conditioning systems for energy storage systems: Topology and control applications in power systems. *IET Renewable Power Generation*, 16(10), 1971–1991. <https://doi.org/10.1049/rpg2.12498>
49. Rosário, A. T., & Dias, J. C. (2022). Sustainability and the Digital Transition: A Literature Review. *Sustainability*, 14(7), 4072. <https://doi.org/10.3390/su14074072>
50. Cortese, T. T. P., Almeida, J. F. S. de, Batista, G. Q., Storopoli, J. E., Liu, A., & Yigitcanlar, T. (2022). Understanding Sustainable Energy in the Context of Smart Cities: A PRISMA Review. *Energies*, 15(7), 2382. <https://doi.org/10.3390/en15072382>
51. Bachmann, N., Tripathi, S., Brunner, M., & Jodlbauer, H. (2022). The Contribution of Data-Driven Technologies in Achieving the Sustainable Development Goals. *Sustainability*, 14(5), 2497. <https://doi.org/10.3390/su14052497>
52. Chawla, Y., Shimpoo, F., & Sokołowski, M. M. (2022). Artificial intelligence and information management in the energy transition of India: lessons from the global IT heart. *Digital Policy, Regulation and Governance*, 24(1), 17–29. <https://doi.org/10.1108/dprg-05-2021-0062>
53. Valdivia, A. D., & Balcells, M. P. (2022). Connecting the grids: A review of blockchain governance in distributed energy transitions. *Energy Research & Social Science*, 84, 102383. <https://doi.org/10.1016/j.erss.2021.102383>
54. IEEE Xplore Full-Text PDF: (n.d.). Ieeexplore.ieee.org. Retrieved January 5, 2024, from <https://ieeexplore.ieee.org/stamp/stamp.jsp?tp=&arnumber=9841550>
55. Hasan, M. K., Alkhalifah, A., Islam, S., Babiker, N. B. M., Habib, A. K. M. A., Aman, A. H. M., & Hossain, M. A. (2022). Blockchain Technology on Smart Grid, Energy Trading, and Big Data: Security Issues, Challenges, and Recommendations. *Wireless Communications and Mobile Computing*, 2022, e9065768. <https://doi.org/10.1155/2022/9065768>
56. Hu, J.-L., Chen, Y.-C., & Yang, Y.-P. (2022). The Development and Issues of Energy-ICT: A Review of Literature with Economic and Managerial Viewpoints. *Energies*, 15(2), 594. <https://doi.org/10.3390/en15020594>
57. Schinckus, C. (2021). Proof-of-work based blockchain technology and Anthropocene: An undermined situation? *Renewable and Sustainable Energy Reviews*, 152, 111682. <https://doi.org/10.1016/j.rser.2021.111682>
58. Mondejar, M. E., Avtar, R., Diaz, H. L. B., Dubey, R. K., Esteban, J., Gómez-Morales, A., Hallam, B., Mbungu, N. T., Okolo, C. C., Prasad, K. A., She, Q., & Garcia-Segura, S. (2021). Digitalization to Achieve Sustainable Development goals: Steps Towards a Smart Green Planet. *Science of the Total Environment*, 794, 148539. <https://doi.org/10.1016/j.scitotenv.2021.148539>
59. Arribas, L., Lechón, Y., Perula, A., Domínguez, J., Ferres, M., Navarro, J., Zarzalejo, L. F., García Barquero, C., & Cruz, I. (2021). Review of Data and Data Sources for the Assessment of the Potential of Utility-Scale Hybrid Wind–Solar PV Power Plants Deployment, under a Microgrid Scope. *Energies*, 14(21), 7434. <https://doi.org/10.3390/en14217434>
60. Strielkowski, W., Dvořák, M., Rovný, P., Tarkhanova, E., & Baburina, N. (2021). 5G Wireless Networks in the Future Renewable Energy Systems. *Frontiers in Energy Research*, 9. <https://doi.org/10.3389/fenrg.2021.714803>
61. Khalil, R. A., Saeed, N., Masood, M., Fard, Y. M., Alouini, M.-S., & Al-Naffouri, T. Y. (2021). Deep Learning in the Industrial Internet of Things: Potentials, Challenges, and Emerging Applications. *IEEE Internet of Things Journal*, 1–1. <https://doi.org/10.1109/jiot.2021.3051414>

62. Hasankhani, A., Mehdi Hakimi, S., Bisheh-Niasar, M., Shafie-khah, M., & Asadolahi, H. (2021). Blockchain technology in the future smart grids: A comprehensive review and frameworks. *International Journal of Electrical Power & Energy Systems*, 129, 106811. <https://doi.org/10.1016/j.ijepes.2021.106811>
63. Strielkowski, W., Sherstobitova, A., Rovny, P., & Evteeva, T. (2021). Increasing Energy Efficiency and Modernization of Energy Systems in Russia: A Review. *Energies*, 14(11), 3164. <https://doi.org/10.3390/en14113164>
64. Santos, A. Q. O., da Silva, A. R., Ledesma, J. J. G., de Almeida, A. B., Cavallari, M. R., & Junior, O. H. A. (2021). Electricity Market in Brazil: A Critical Review on the Ongoing Reform. *Energies*, 14(10), 2873. <https://doi.org/10.3390/en14102873>
65. Wang, Q., Li, R., & Zhan, L. (2021). Blockchain technology in the energy sector: From basic research to real world applications. *Computer Science Review*, 39, 100362. <https://doi.org/10.1016/j.cosrev.2021.100362>
66. IEEE Xplore Full-Text PDF: (n.d.). Ieeexplore.ieee.org. Retrieved January 5, 2024, from <https://ieeexplore.ieee.org/stamp/stamp.jsp?tp=&arnumber=9585578>
67. Alotaibi, I., Abido, M. A., Khalid, M., & Savkin, A. V. (2020). A Comprehensive Review of Recent Advances in Smart Grids: A Sustainable Future with Renewable Energy Resources. *Energies*, 13(23), 6269. <https://doi.org/10.3390/en13236269>
68. Roblek, V., Thorpe, O., Bach, M. P., Jerman, A., & Meško, M. (2020). The Fourth Industrial Revolution and the Sustainability Practices: A Comparative Automated Content Analysis Approach of Theory and Practice. *Sustainability*, 12(20), 8497. <https://doi.org/10.3390/su12208497>
69. Sundararajan, A., Hernandez, A. S., & Sarwat, A. (2020). Adapting Big Data Standards, Maturity Models to Smart Grid Distributed Generation: Critical Review. *IET Smart Grid*. <https://doi.org/10.1049/iet-stg.2019.0298>
70. Hoffmann, M. W., Wildermuth, S., Gitzel, R., Boyaci, A., Gebhardt, J., Kaul, H., Amihai, I., Forg, B., Suriyah, M., Leibfried, T., Stich, V., Hicking, J., Bremer, M., Kaminski, L., Beverungen, D., zur Heiden, P., & Tornede, T. (2020). Integration of Novel Sensors and Machine Learning for Predictive Maintenance in Medium Voltage Switchgear to Enable the Energy and Mobility Revolutions. *Sensors*, 20(7), 2099. <https://doi.org/10.3390/s20072099>
71. Bongomin, O., Yemane, A., Kembabazi, B., Malanda, C., Chikonkolo Mwape, M., Sheron Mpofo, N., & Tigalana, D. (2020). Industry 4.0 Disruption and Its Neologisms in Major Industrial Sectors: A State of the Art. *Journal of Engineering*, 2020, 1–45. <https://doi.org/10.1155/2020/8090521>
72. Furstenau, L. B., Sott, M. K., Kipper, L. M., Machado, E. L., Lopez-Robles, J. R., Dohan, M. S., Cobo, M. J., Zahid, A., Abbasi, Q. H., & Imran, M. A. (2020). Link Between Sustainability and Industry 4.0: Trends, Challenges and New Perspectives. *IEEE Access*, 8, 140079–140096. <https://doi.org/10.1109/access.2020.3012812>
73. Vrchota, J., Pech, M., Rolínek, L., & Bednář, J. (2020). Sustainability Outcomes of Green Processes in Relation to Industry 4.0 in Manufacturing: Systematic Review. *Sustainability*, 12(15), 5968. <https://doi.org/10.3390/su12155968>
74. Hossein Motlagh, N., Mohammadrezaei, M., Hunt, J., & Zakeri, B. (2020). Internet of Things (IoT) and the Energy Sector. *Energies*, 13(2), 494. <https://doi.org/10.3390/en13020494>
75. Nižetić, S., Djilali, N., Papadopoulos, A., & Rodrigues, J. J. P. C. (2019). Smart technologies for promotion of energy efficiency, utilization of sustainable resources and waste management. *Journal of Cleaner Production*, 231, 565–591. <https://doi.org/10.1016/j.jclepro.2019.04.397>
76. Sánchez-Corcuera, R., Nuñez-Marcos, A., Sesma-Solance, J., Bilbao-Jayo, A., Mulero, R., Zulaika, U., Azkune, G., & Almeida, A. (2019). Smart cities survey: Technologies, application domains and challenges for the cities of the future. *International Journal of Distributed Sensor Networks*, 15(6), 155014771985398. <https://doi.org/10.1177/1550147719853984>
77. Rasagam, G., & Zhu, D. (2018). Delivering on the Promise of Distributed Renewable Energy Entrepreneurship in Sub-Saharan Africa. *Current Sustainable/Renewable Energy Reports*, 5(4), 230–239. <https://doi.org/10.1007/s40518-018-0120-x>
78. Ramirez Camargo, L., & Stoeglehner, G. (2018). Spatiotemporal modelling for integrated spatial and energy planning. *Energy, Sustainability and Society*, 8(1). <https://doi.org/10.1186/s13705-018-0174-z>

79. Shaukat, N., Ali, S. M., Mehmood, C. A., Khan, B., Jawad, M., Farid, U., Ullah, Z., Anwar, S. M., & Majid, M. (2018). A survey on consumers empowerment, communication technologies, and renewable generation penetration within Smart Grid. *Renewable and Sustainable Energy Reviews*, 81, 1453–1475. <https://doi.org/10.1016/j.rser.2017.05.208>
80. Yan, Y., Qian, Y., Sharif, H., & Tipper, D. (2013). A Survey on Smart Grid Communication Infrastructures: Motivations, Requirements and Challenges. *IEEE Communications Surveys & Tutorials*, 15(1), 5–20. <https://doi.org/10.1109/surv.2012.021312.00034>
81. Yu, W., Patros, P., Young, B., Klinac, E., & Walmsley, T. G. (2022). Energy digital twin technology for industrial energy management: Classification, challenges and future. *Renewable and Sustainable Energy Reviews*, 161, 112407. <https://doi.org/10.1016/j.rser.2022.112407>
82. Hua, W., Chen, Y., Qadrdan, M., Jiang, J., Sun, H., & Wu, J. (2022). Applications of blockchain and artificial intelligence technologies for enabling prosumers in smart grids: A review. *Renewable and Sustainable Energy Reviews*, 161, 112308. <https://doi.org/10.1016/j.rser.2022.112308>
83. Zahurul, S., Mariun, N., Grozescu, I. V., Tsuyoshi, H., Mitani, Y., Othman, M. L., Hizam, H., & Abidin, I. Z. (2016). Future strategic plan analysis for integrating distributed renewable generation to smart grid through wireless sensor network: Malaysia prospect. *Renewable and Sustainable Energy Reviews*, 53, 978–992. <https://doi.org/10.1016/j.rser.2015.09.020>
84. Andoni, M., Robu, V., Flynn, D., Abram, S., Geach, D., Jenkins, D., McCallum, P., & Peacock, A. (2019). Blockchain technology in the energy sector: A systematic review of challenges and opportunities. *Renewable and Sustainable Energy Reviews*, 100(1), 143–174. <https://doi.org/10.1016/j.rser.2018.10.014>
85. Wolsink, M. (2020). Distributed energy systems as common goods: Socio-political acceptance of renewables in intelligent microgrids. *Renewable and Sustainable Energy Reviews*, 127, 109841. <https://doi.org/10.1016/j.rser.2020.109841>
86. Jodeiri, A. M., Goldsworthy, M. J., Buffa, S., & Cozzini, M. (2022). Role of sustainable heat sources in transition towards fourth generation district heating – A review. *Renewable and Sustainable Energy Reviews*, 158, 112156. <https://doi.org/10.1016/j.rser.2022.112156>
87. Mazzoni, D. (2019). Digitalization for Energy Access in Sub-Saharan Africa : Challenges, Opportunities and Potential Business Models. *SSRN Electronic Journal*. <https://doi.org/10.2139/ssrn.3364168>
88. Long, H., Fu, X., Kong, W., Chen, H., Zhou, Y., & Yang, F. (2022). Key technologies and applications of rural energy internet in China. *Information Processing in Agriculture*. <https://doi.org/10.1016/j.inpa.2022.03.001>
89. Md. Hasanuzzaman, Md. Hasanuzzaman, & Cuce, E. (2022). *Prospects and challenges of renewable energy-based microgrid system in Bangladesh: a comprehensive review*. 24(7), 1987–2009. <https://doi.org/10.1007/s10098-022-02301-5>
90. Amir, M., & Khan, S. Z. (2021). Assessment of renewable energy: Status, challenges, COVID-19 impacts, opportunities, and sustainable energy solutions in Africa. *Energy and Built Environment*, 3(3). <https://doi.org/10.1016/j.enbenv.2021.03.002>
91. Stojanova, S., Lentini, G., Niederer, P., Egger, T., Cvar, N., Kos, A., & Stojmenova Duh, E. (2021). Smart Villages Policies: Past, Present and Future. *Sustainability*, 13(4), 1663. <https://doi.org/10.3390/su13041663>
92. Reddy, G. P., Kumar, Y. V. P., & Chakravarthi, M. K. (2022). Communication Technologies for Interoperable Smart Microgrids in Urban Energy Community: A Broad Review of the State of the Art, Challenges, and Research Perspectives. *Sensors*, 22(15), 5881. <https://doi.org/10.3390/s22155881>
93. Jayachandran, M., Gatla, R. K., Rao, K. P., Rao, G. S., Mohammed, S., Milyani, A. H., Azhari, A. A., Kalaiarasy, C., & Geetha, S. (2022). Challenges in achieving sustainable development goal 7: Affordable and clean energy in light of nascent technologies. *Sustainable Energy Technologies and Assessments*, 53, 102692. <https://doi.org/10.1016/j.seta.2022.102692>
94. Bhattarai, T. N., Ghimire, S., Mainali, B., Gorjian, S., Treichel, H., & Paudel, S. R. (2022). Applications of smart grid technology in Nepal: status, challenges, and opportunities. *Environmental Science and Pollution Research*. <https://doi.org/10.1007/s11356-022-19084-3>

95. Chartier, S. L., Venkiteswaran, V. K., Rangarajan, S. S., Collins, E. R., & Senjyu, T. (2022). Microgrid Emergence, Integration, and Influence on the Future Energy Generation Equilibrium—A Review. *Electronics*, 11(5), 791. <https://doi.org/10.3390/electronics11050791>
96. Banihabib, R., & Assadi, M. (2022). The Role of Micro Gas Turbines in Energy Transition. *Energies*, 15(21), 8084. <https://doi.org/10.3390/en15218084>
97. Ponnusamy, V. K., Kasinathan, P., Madurai Elavarasan, R., Ramanathan, V., Anandan, R. K., Subramaniam, U., Ghosh, A., & Hossain, E. (2021). A Comprehensive Review on Sustainable Aspects of Big Data Analytics for the Smart Grid. *Sustainability*, 13(23), 13322. <https://doi.org/10.3390/su132313322>
98. Bürer, M. J., de Lapparent, M., Pallotta, V., Capezzali, M., & Carpita, M. (2019). Use cases for Blockchain in the Energy Industry Opportunities of emerging business models and related risks. *Computers & Industrial Engineering*, 137, 106002. <https://doi.org/10.1016/j.cie.2019.106002>
99. Farooq, A., & Wu, X. (2022). Review of edutainment immersive visualization (IV) development tools for simulating renewable energy systems (RESs). *Energy Strategy Reviews*, 44, 101000. <https://doi.org/10.1016/j.esr.2022.101000>
100. Zafar, B., & Ben Slama, S. (2022). Energy Internet Opportunities in Distributed Peer-to-Peer Energy Trading Reveal by Blockchain for Future Smart Grid 2.0. *Sensors*, 22(21), 8397. <https://doi.org/10.3390/s22218397>
101. Neska, E., & Kowalska-Pyzalska, A. (2022). Conceptual design of energy market topologies for communities and their practical applications in EU: A comparison of three case studies. *Renewable and Sustainable Energy Reviews*, 169, 112921. <https://doi.org/10.1016/j.rser.2022.112921>
102. Norouzi, F., Hoppe, T., Elizondo, L. R., & Bauer, P. (2022). A review of socio-technical barriers to Smart Microgrid development. *Renewable and Sustainable Energy Reviews*, 167, 112674. <https://doi.org/10.1016/j.rser.2022.112674>
103. Singh, R., Akram, S. V., Gehlot, A., Buddhi, D., Priyadarshi, N., & Twala, B. (2022). Energy System 4.0: Digitalization of the Energy Sector with Inclination towards Sustainability. *Sensors*, 22(17), 6619. <https://doi.org/10.3390/s22176619>
104. Kirli, D., Couraud, B., Robu, V., Salgado-Bravo, M., Norbu, S., Andoni, M., Antonopoulos, I., Negrete-Pincetic, M., Flynn, D., & Kiprakis, A. (2022). Smart contracts in energy systems: A systematic review of fundamental approaches and implementations. *Renewable and Sustainable Energy Reviews*, 158, 112013. <https://doi.org/10.1016/j.rser.2021.112013>
105. Jasiūnas, J., Lund, P. D., & Mikkola, J. (2021). Energy system resilience – A review. *Renewable and Sustainable Energy Reviews*, 150, 111476. <https://doi.org/10.1016/j.rser.2021.111476>
106. M. A., & TURKER, U. (2021). Digital Transformation for Sustainable Future - Agriculture 4.0 : A review. *Tarım Bilimleri Dergisi*. <https://doi.org/10.15832/ankutbd.986431>
